# Supplementary material
Source: PubMed Central journal article supplement (PMC4432134)
Supplement: AAC.04442-14_zac006154065so1.pdf [file AAC.04442-14_zac006154065so1.pdf]

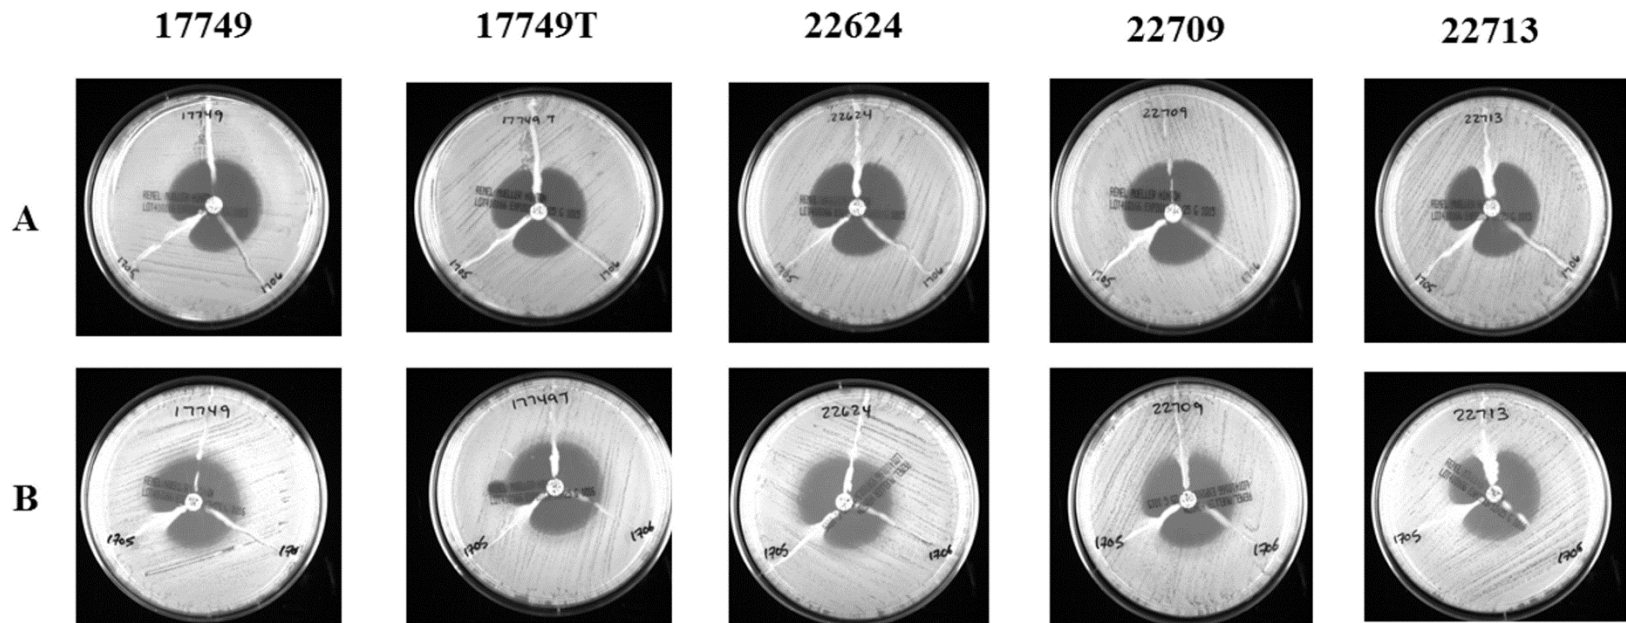

**Supplemental Figure S1. Modified Hodge test (mHT):** with (A) ertapenem and (B) meropenem on selected clinical isolates. Positive (*K. pneumoniae* ATCC 1705) and negative (*K. pneumoniae* ATCC 1706) controls are included for comparison.

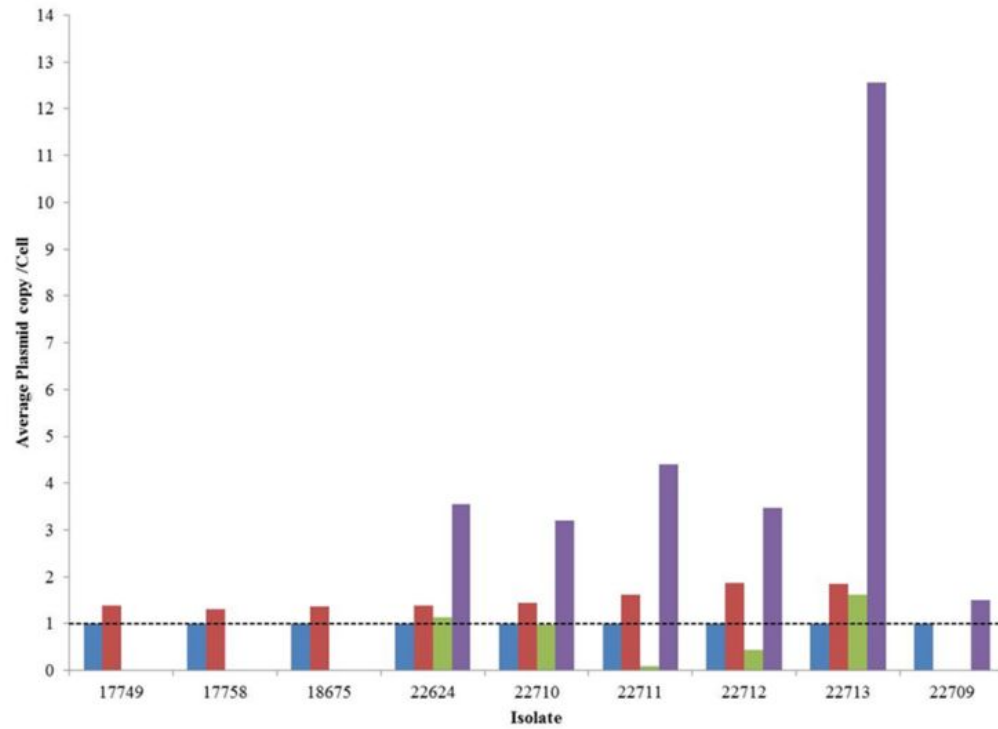

**Supplemental Figure S2. Average copy per cell**, normalized to the chromosomal read coverage, of the chromosome (blue), pMR0713 (red), pMR0514 (green), and pMR3-OXA181 (purple) in clinical isolates. Read coverage was calculated from raw reads using Geneious (Biomatters, Auckland, New Zealand) software.
